# Supplementary material for: Inhibition of HIV Replication by Cyclic and Hairpin PNAs Targeting the HIV-1 TAR RNA Loop
Source: Hindawi journal article supplement (doi:10.1155/2012/591025), 2012-01-01

# **Supporting Information**

## **Inhibition of HIV replication by cyclic and hairpin PNAs targeting the HIV-1 TAR RNA loop**

Gregory Upert, Audrey Di Giorgio, Alok Upadhyay, Dinesh Manvar, Nootan Pandey, Virendra N. Pandey\*  
and Nadia Patino\*

**A - HPLC and ESI MS spectra of PNA (3-6) and TPP-[PNA 1a-c, 2-6] .....S2**

**B - Thermal denaturation followed by UV spectroscopy.....S14**

**A - HPLC and ESI MS spectra of PNAs (3-6) and TPP-[PNA 1a-c, 2-6]**

**c(Lys-TCCCAG-Gln)<sub>n=4</sub> (PNA 3)**

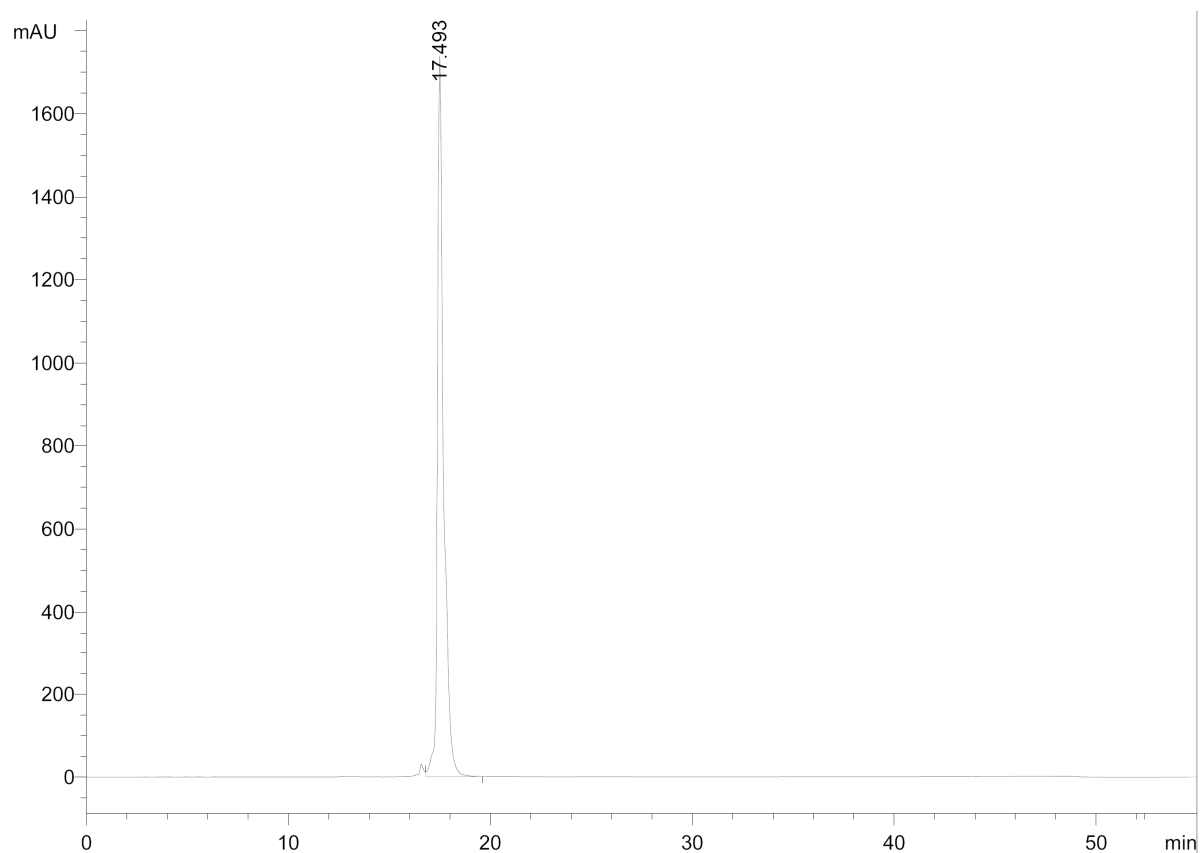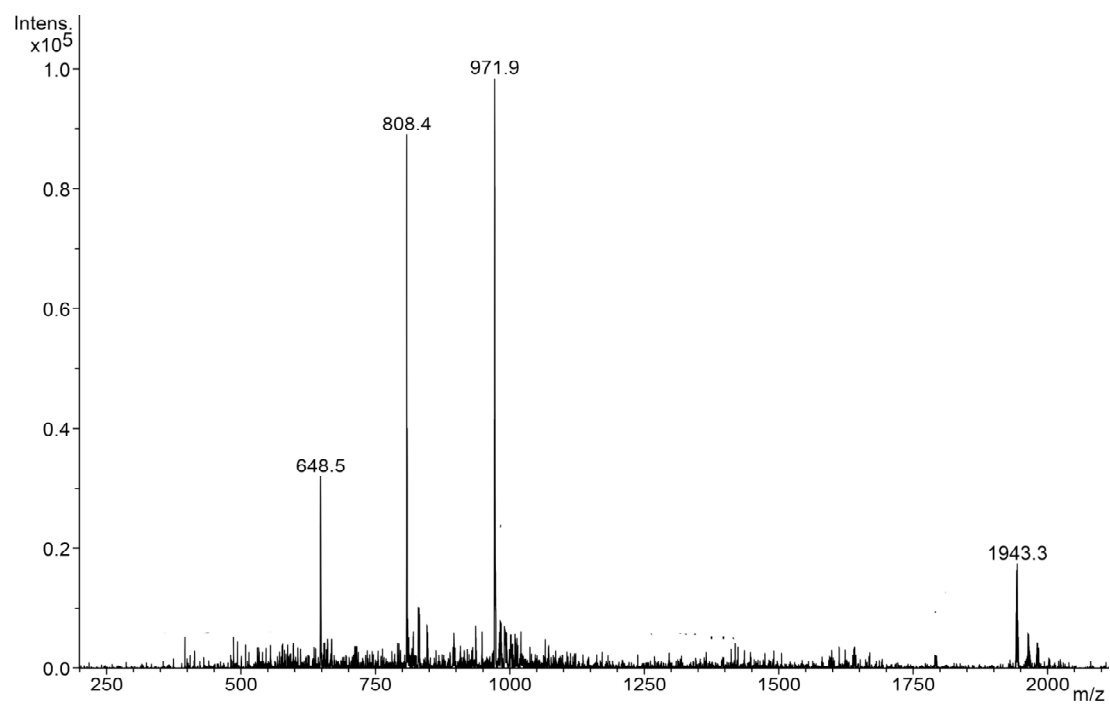

**Ac-Lys-CGGTCCCAGACG-NH<sub>2</sub> (PNA 4)**

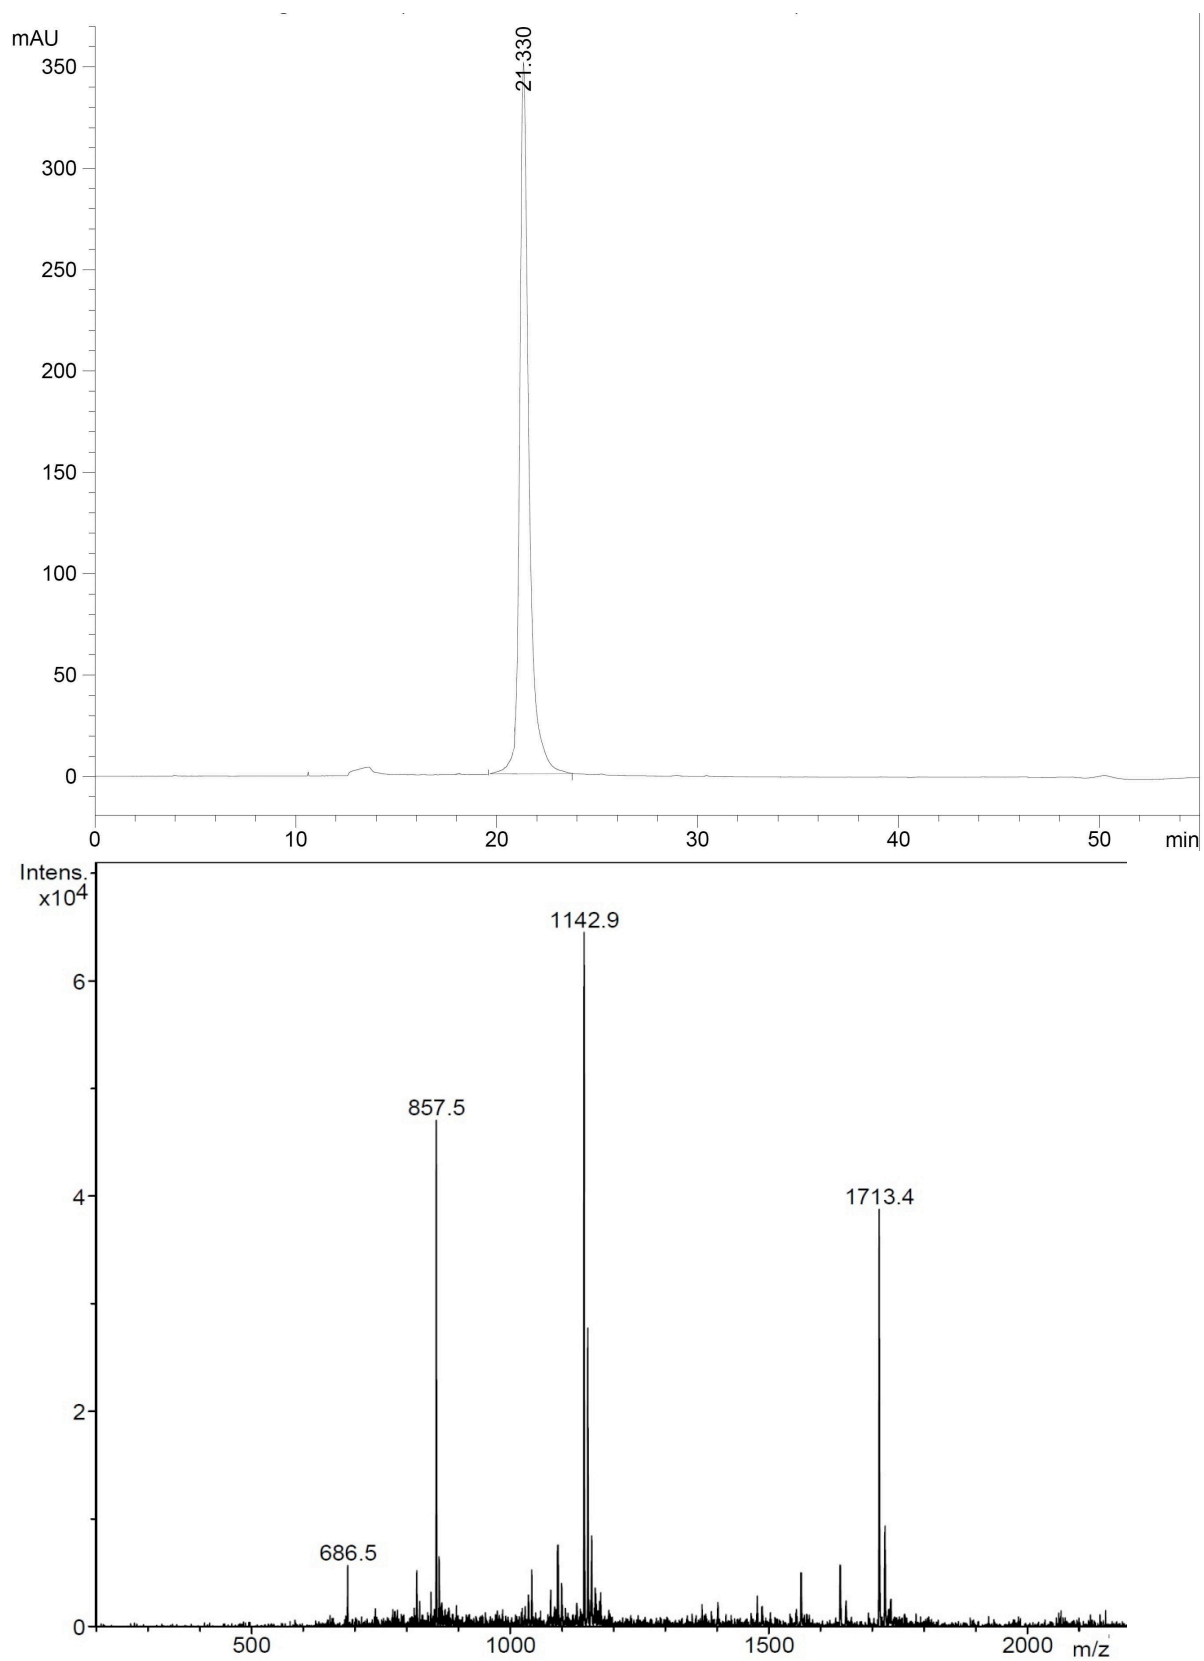

**Ac-Lys-CGCGGTCCCAGACGCG-NH<sub>2</sub> (PNA 5)**

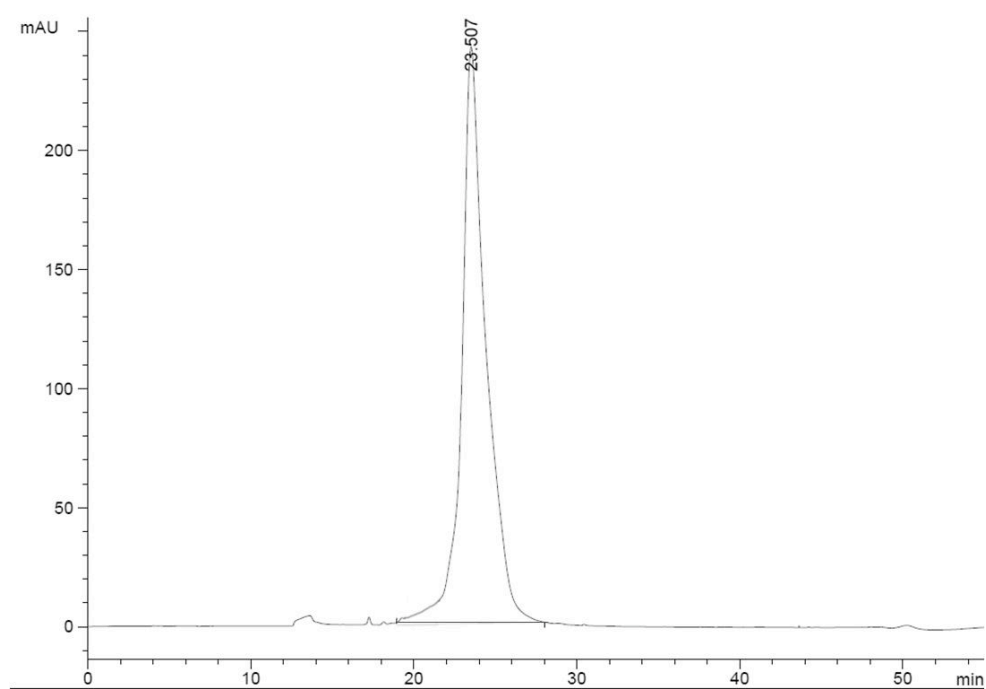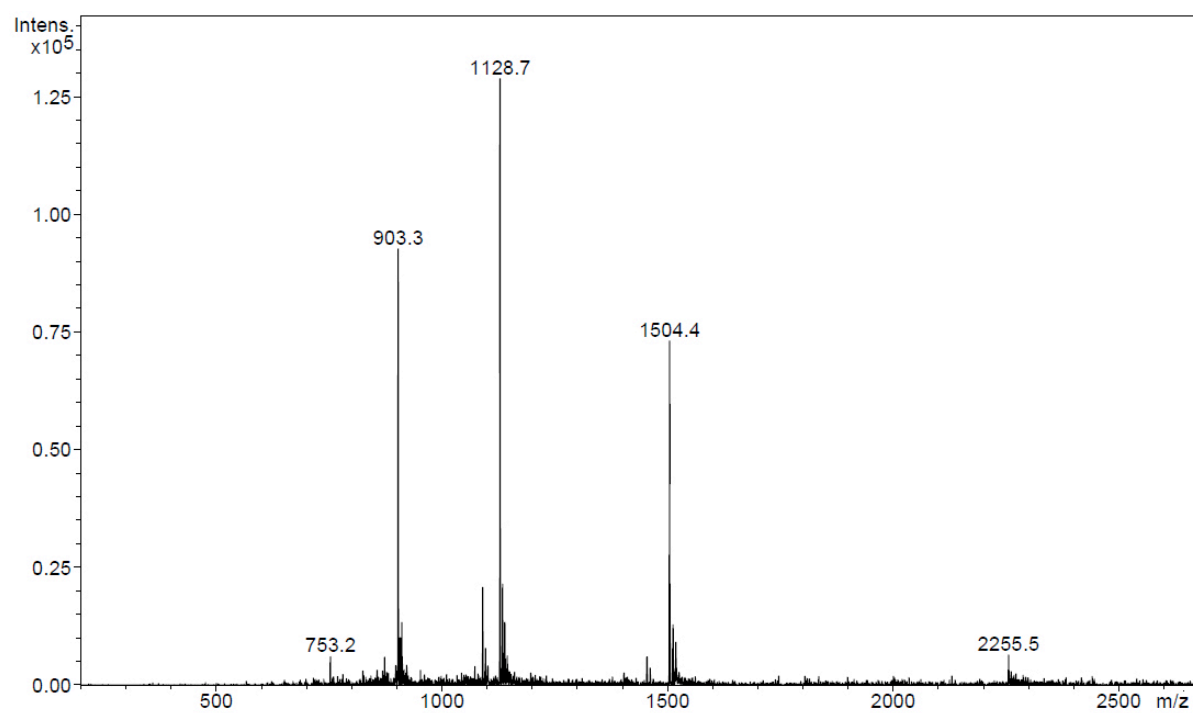

**Ac-Lys-CGTCCCAGCG-NH<sub>2</sub> (PNA 6)**

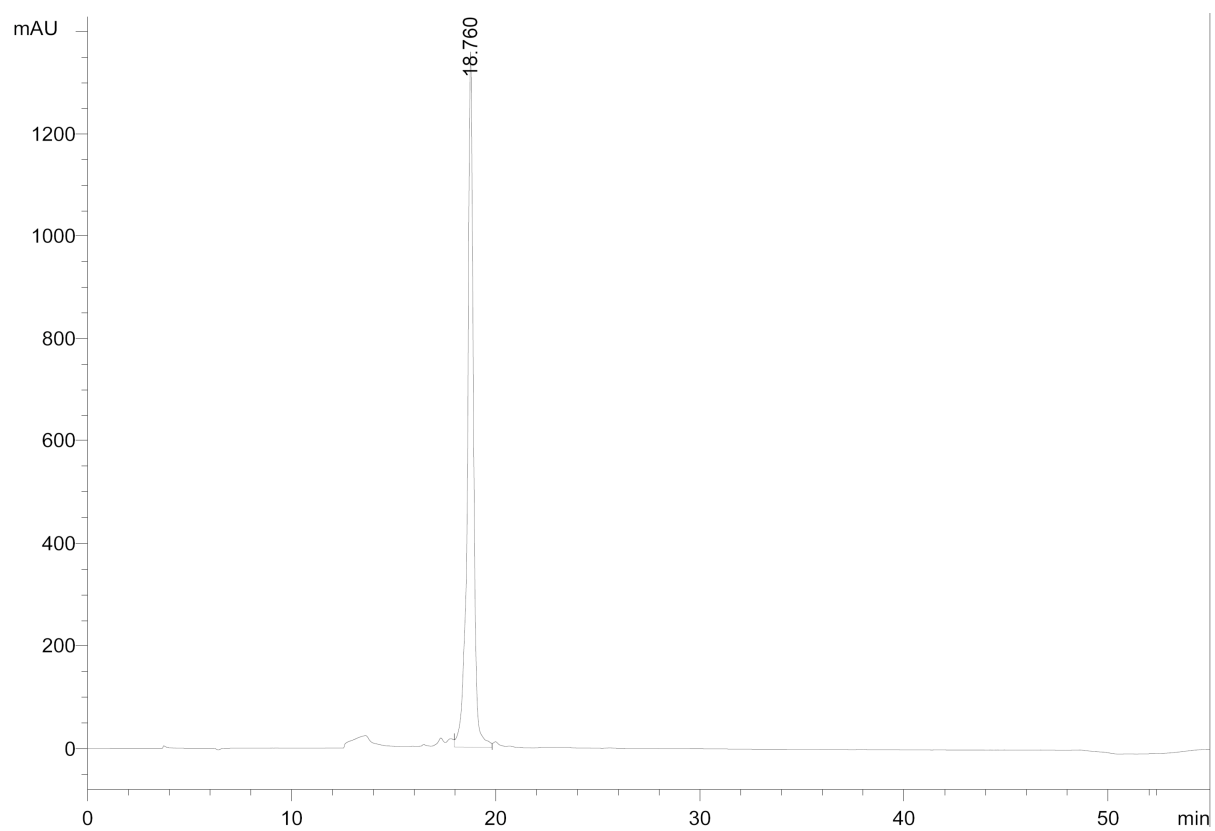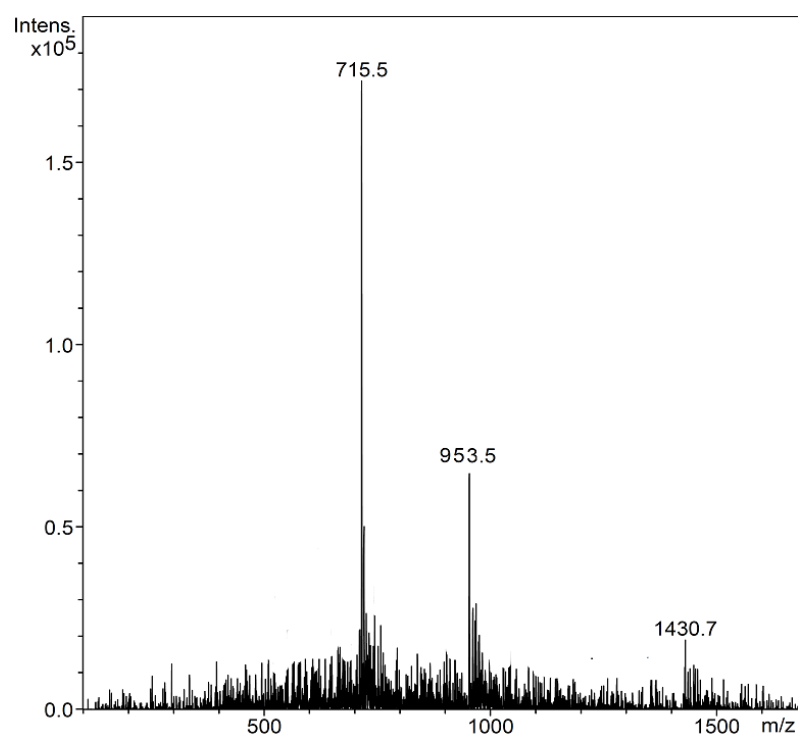

## TPP-[PNA 1a]

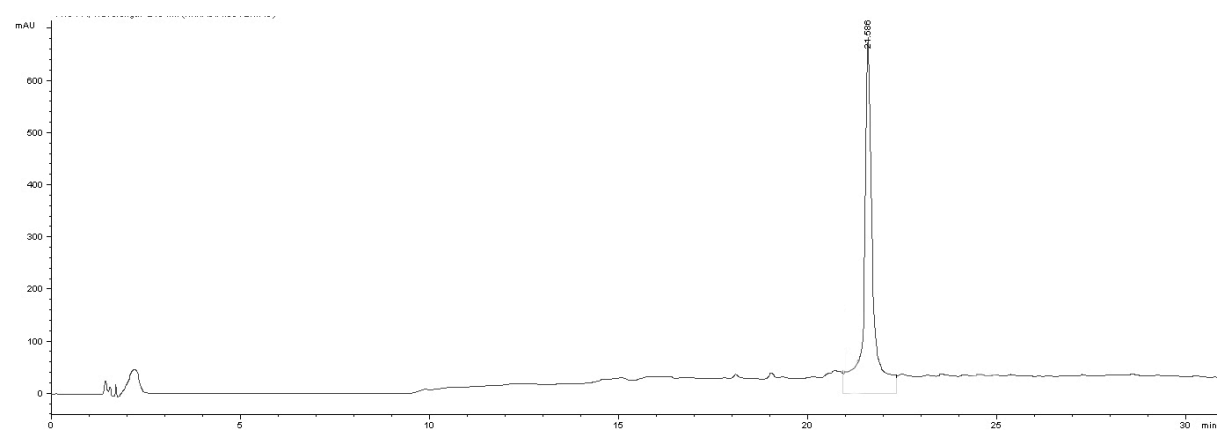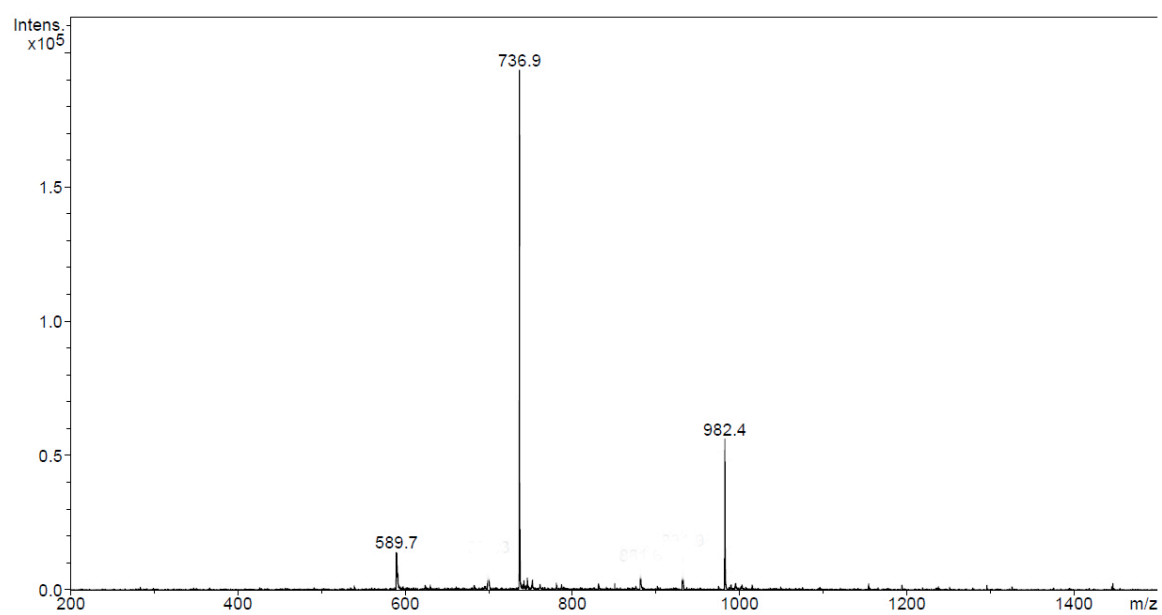

## TPP-[PNA 1b]

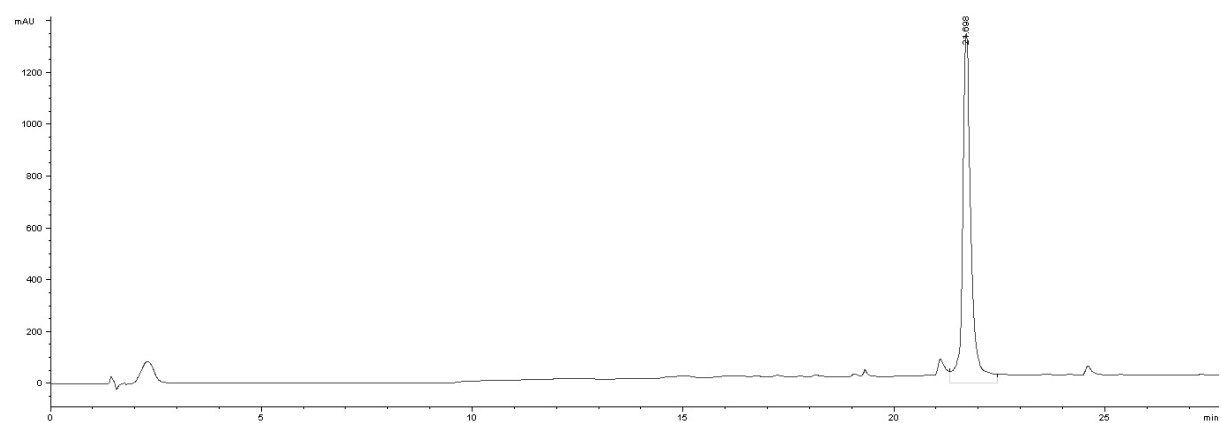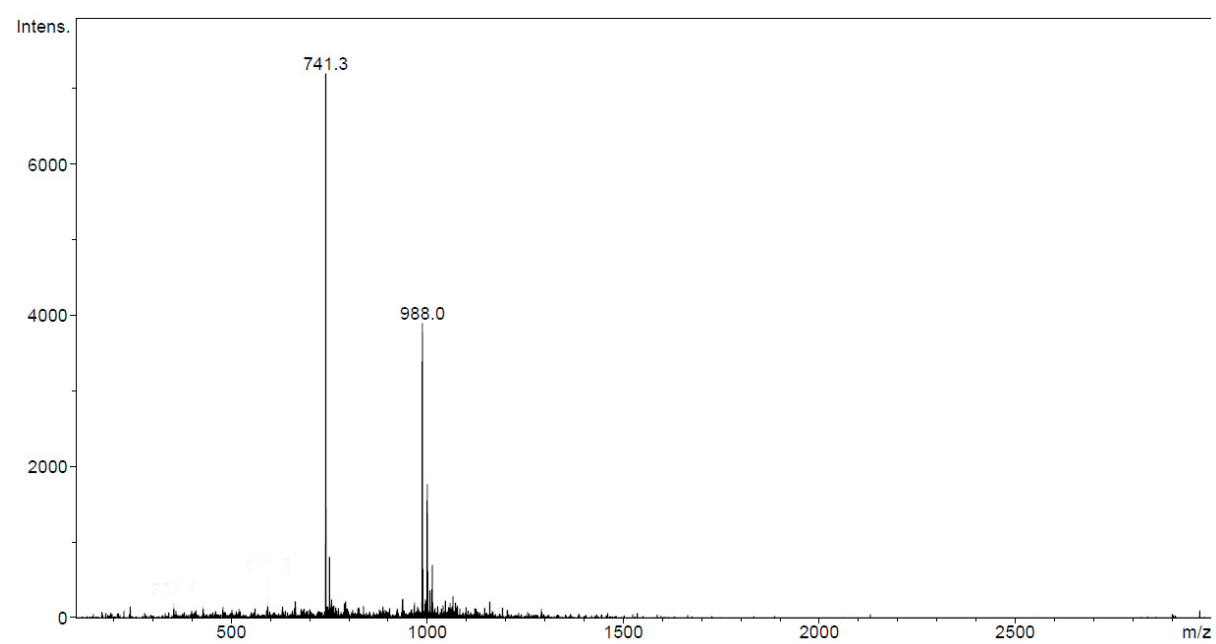

## TPP-[PNA 1c]

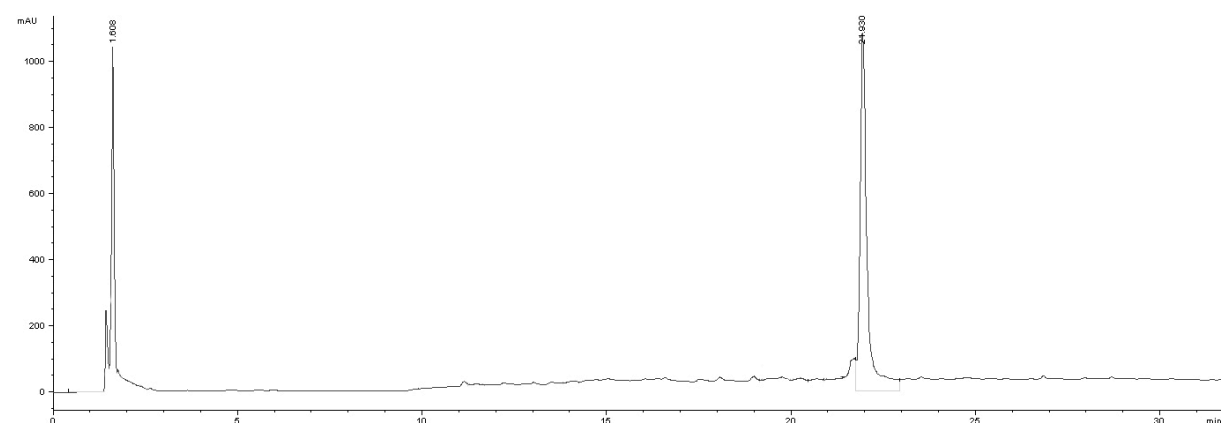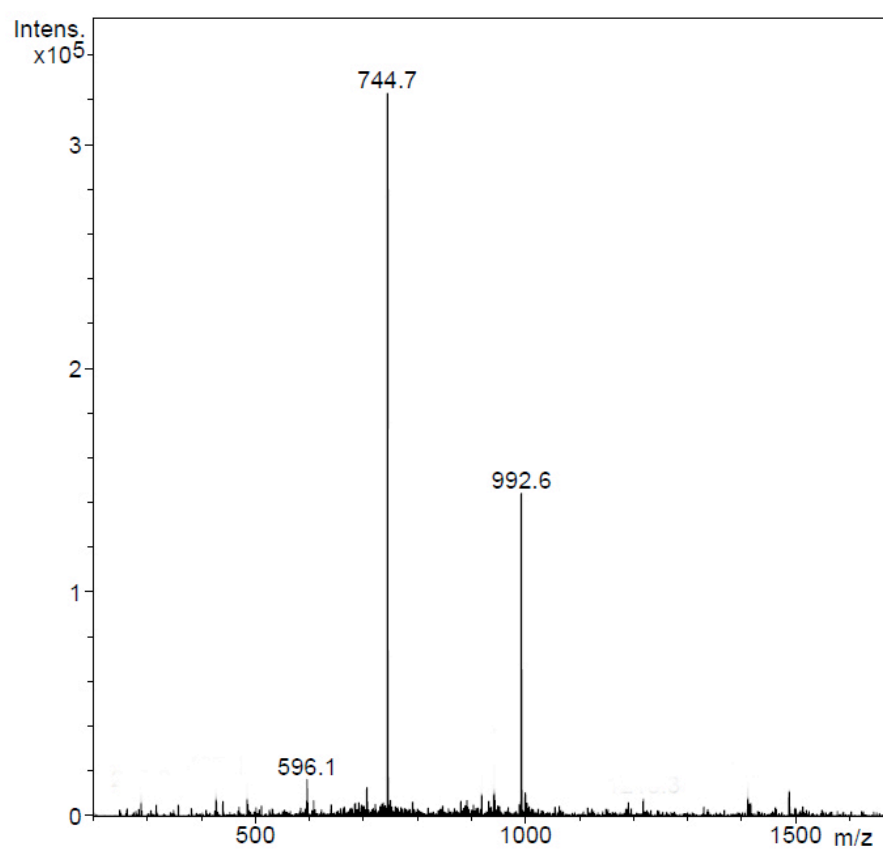

# TPP-[PNA 2]

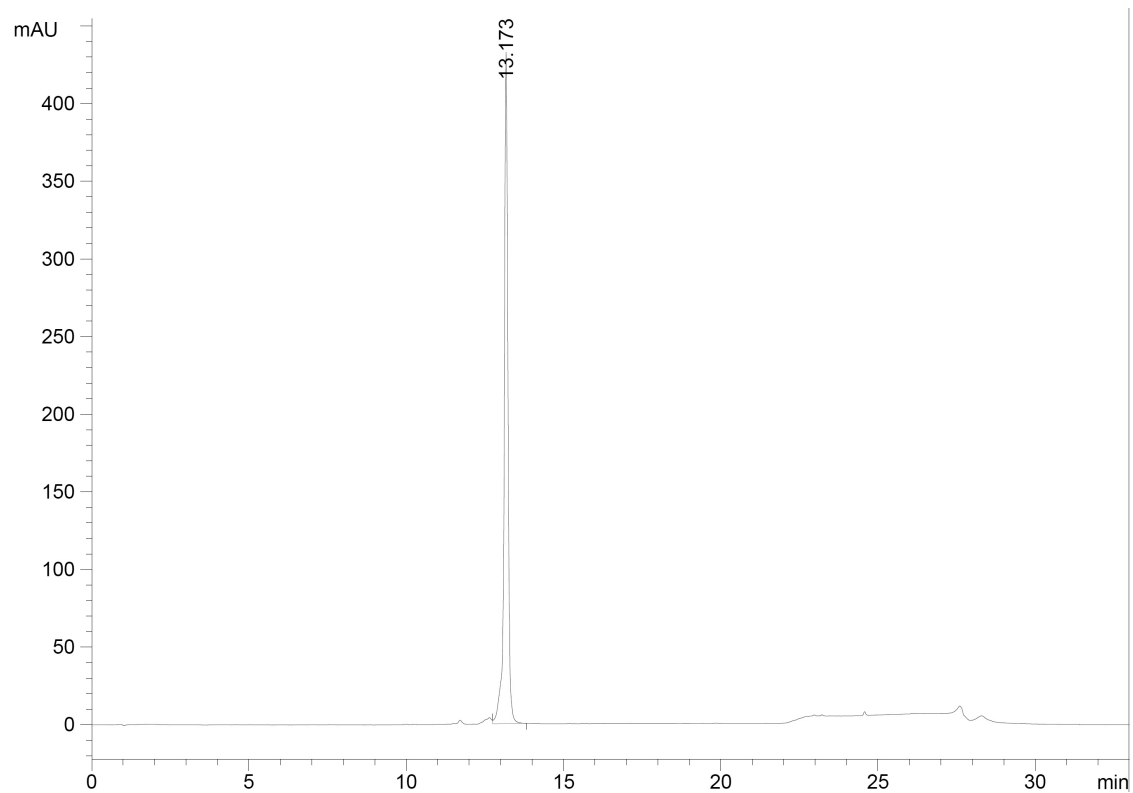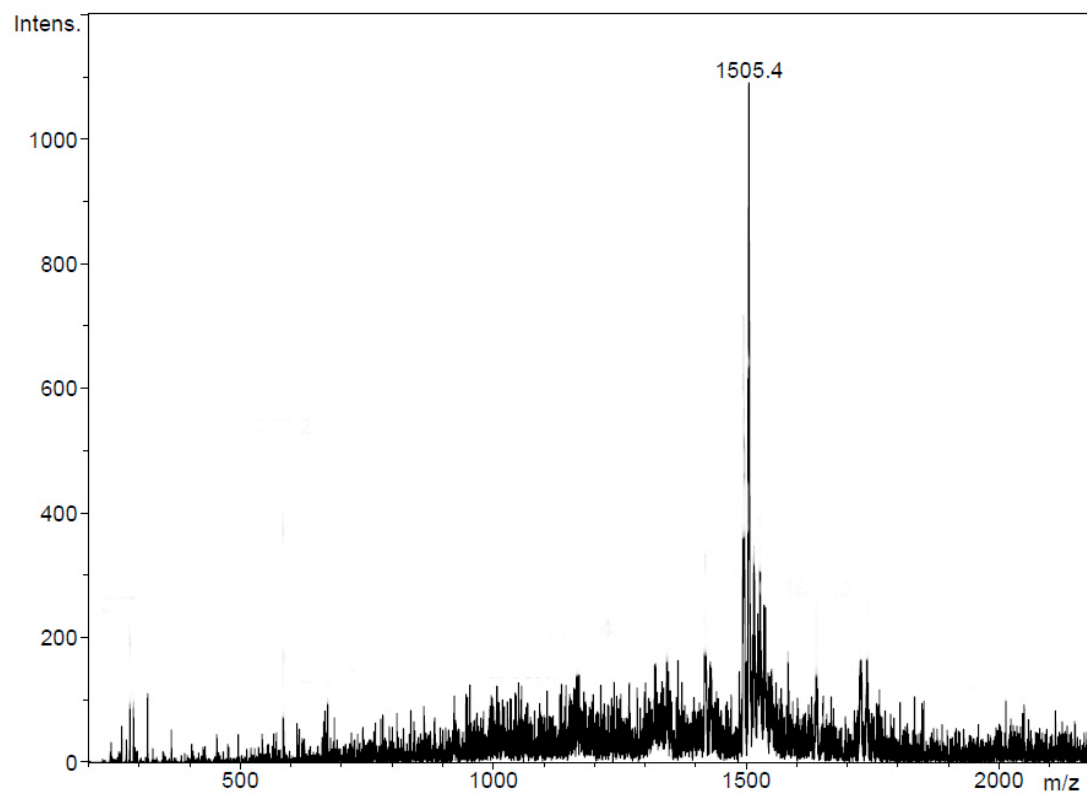

# TPP-[PNA 3]

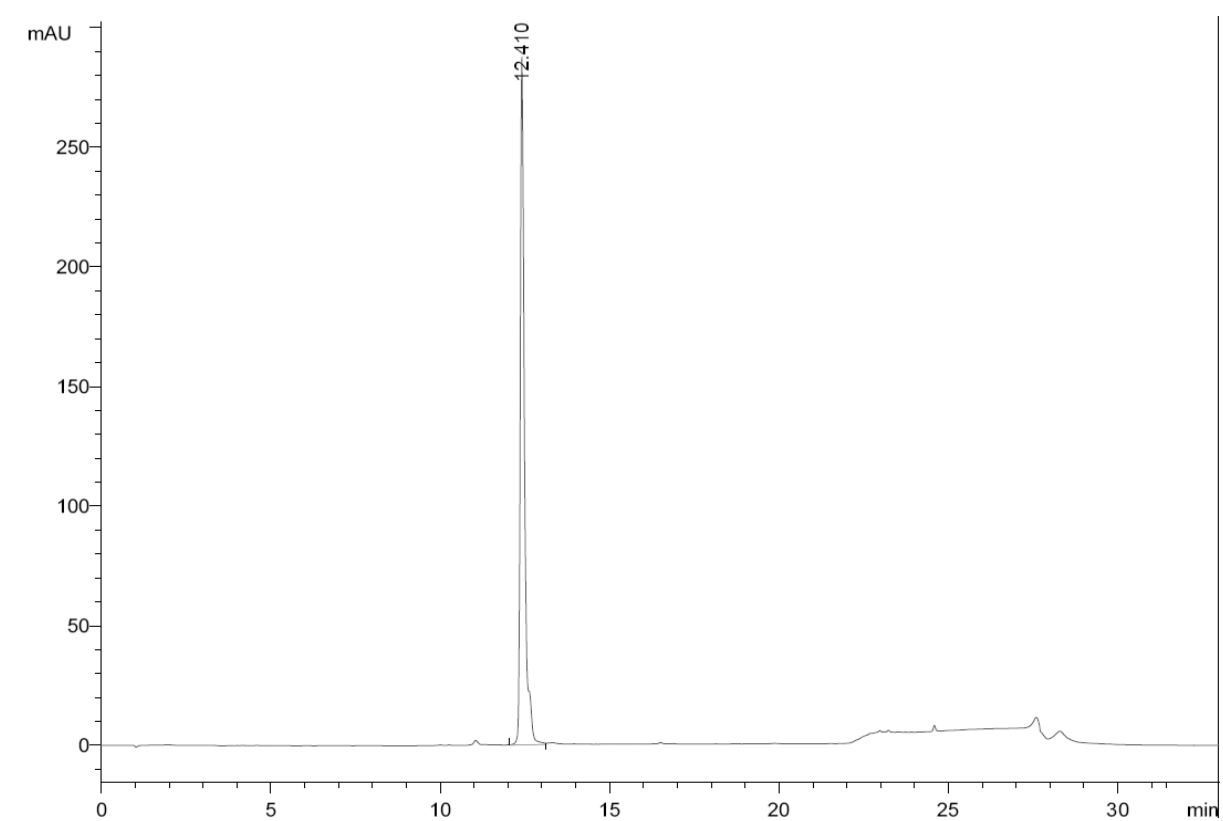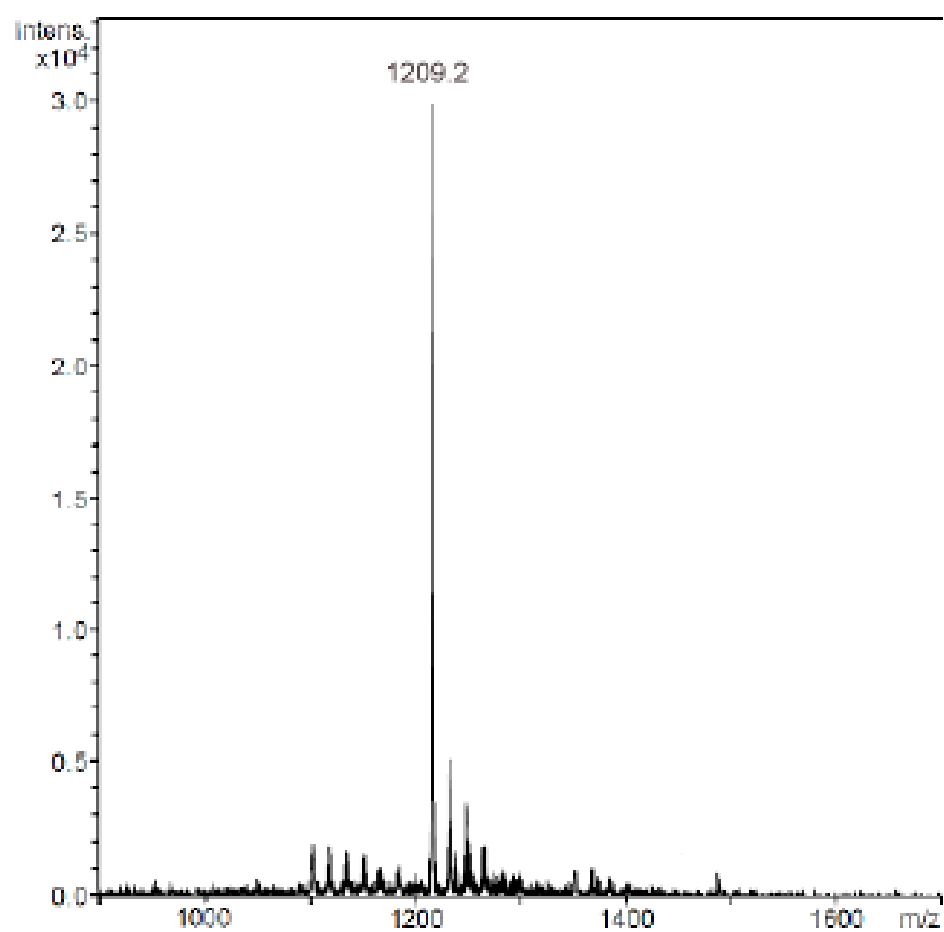

## TPP-[PNA 4]

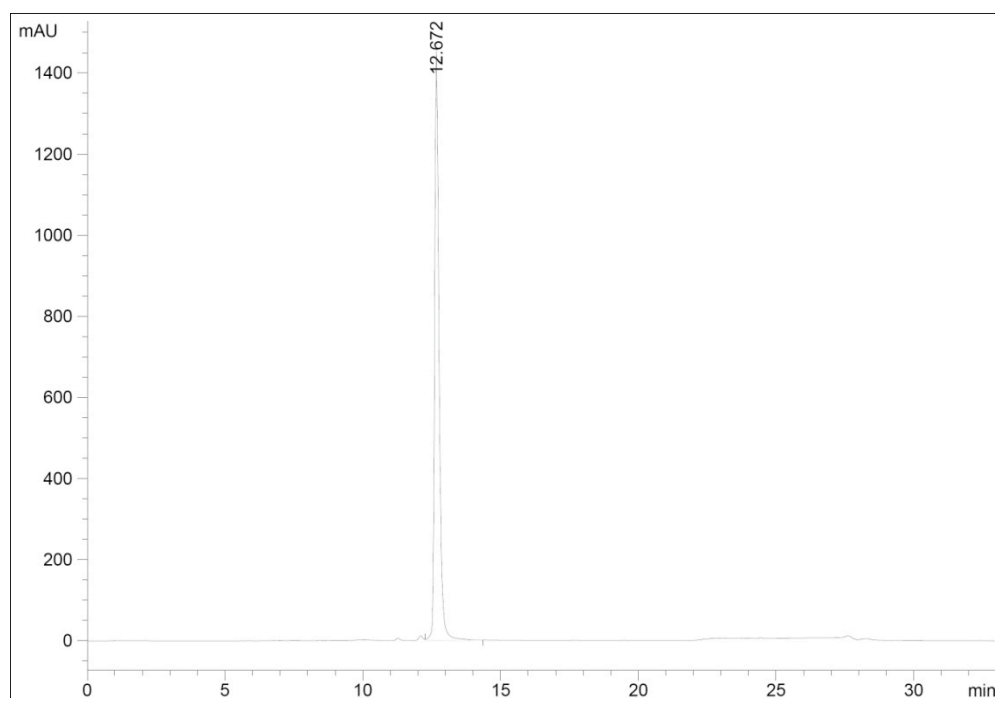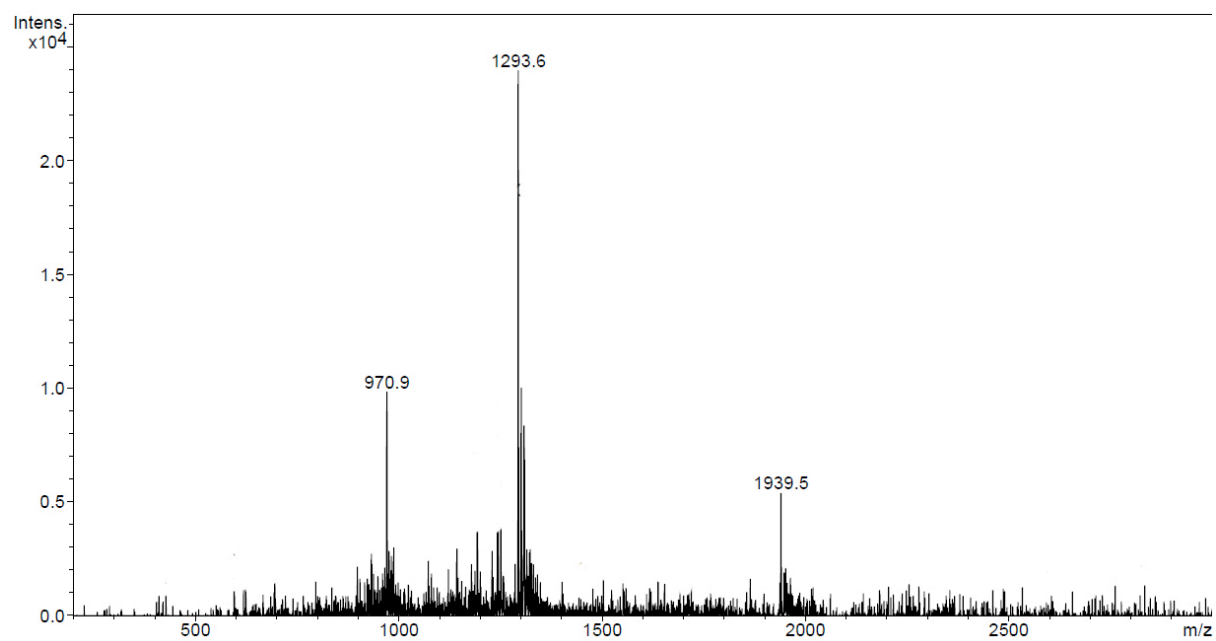

# TPP-[PNA 5]

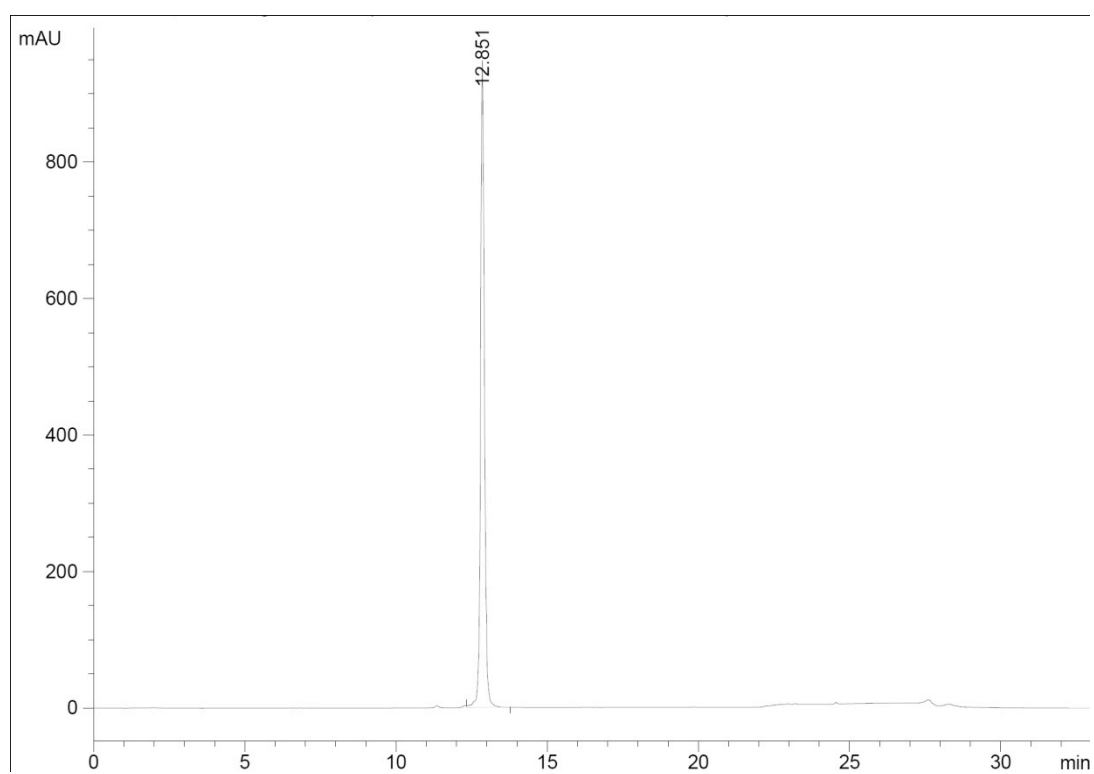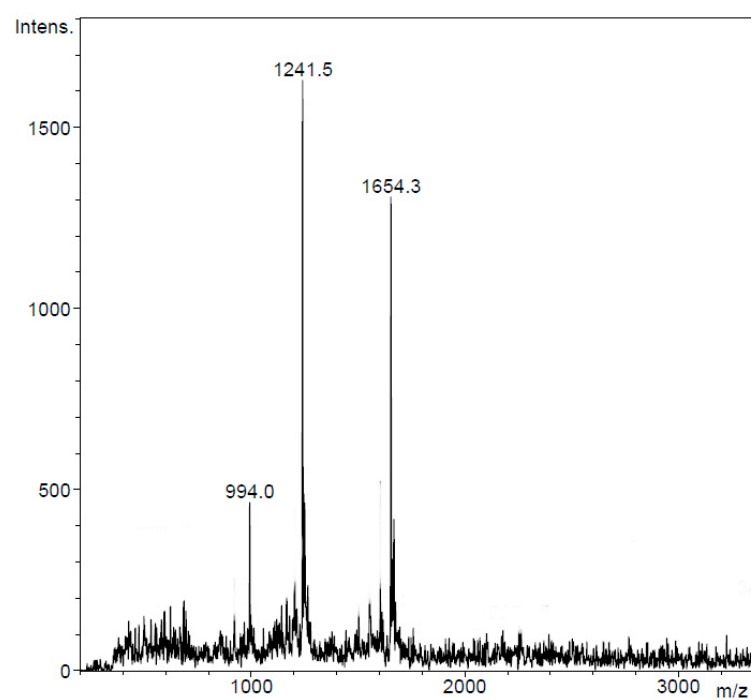

# TPP-[PNA 6]

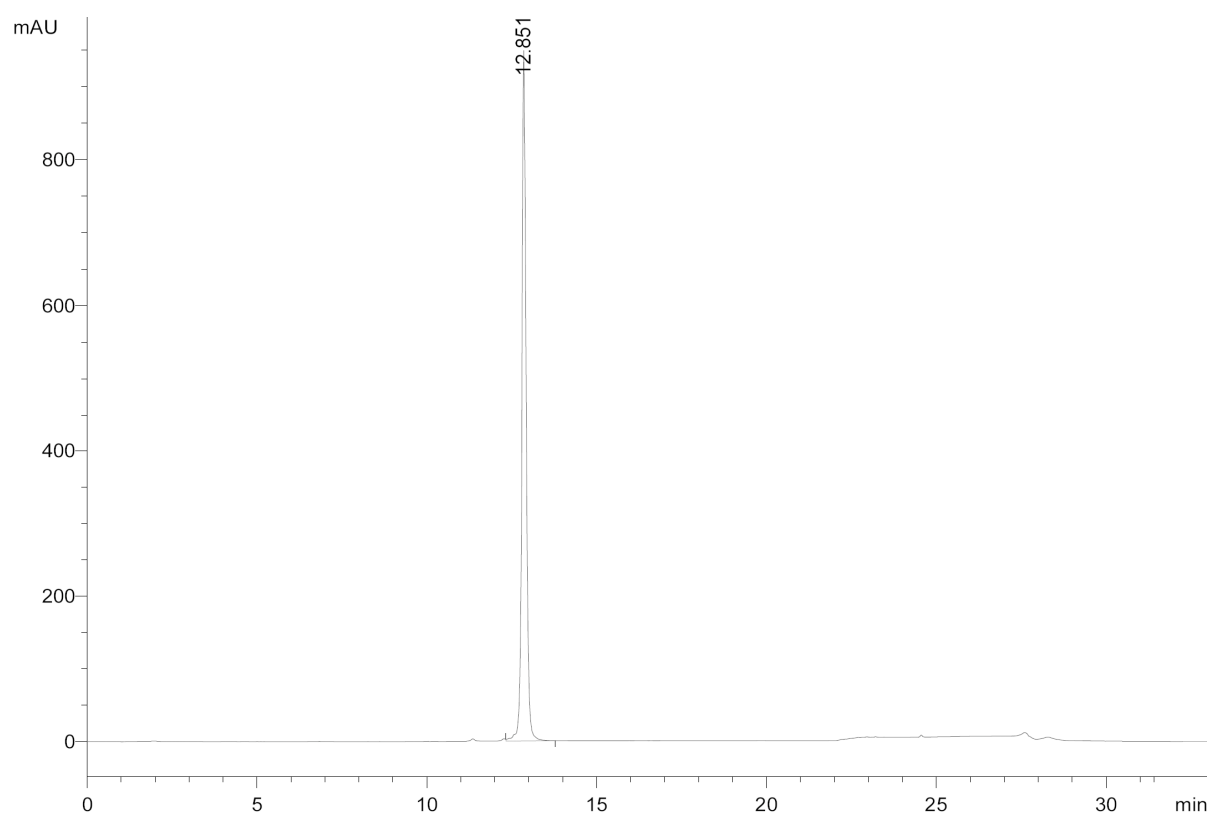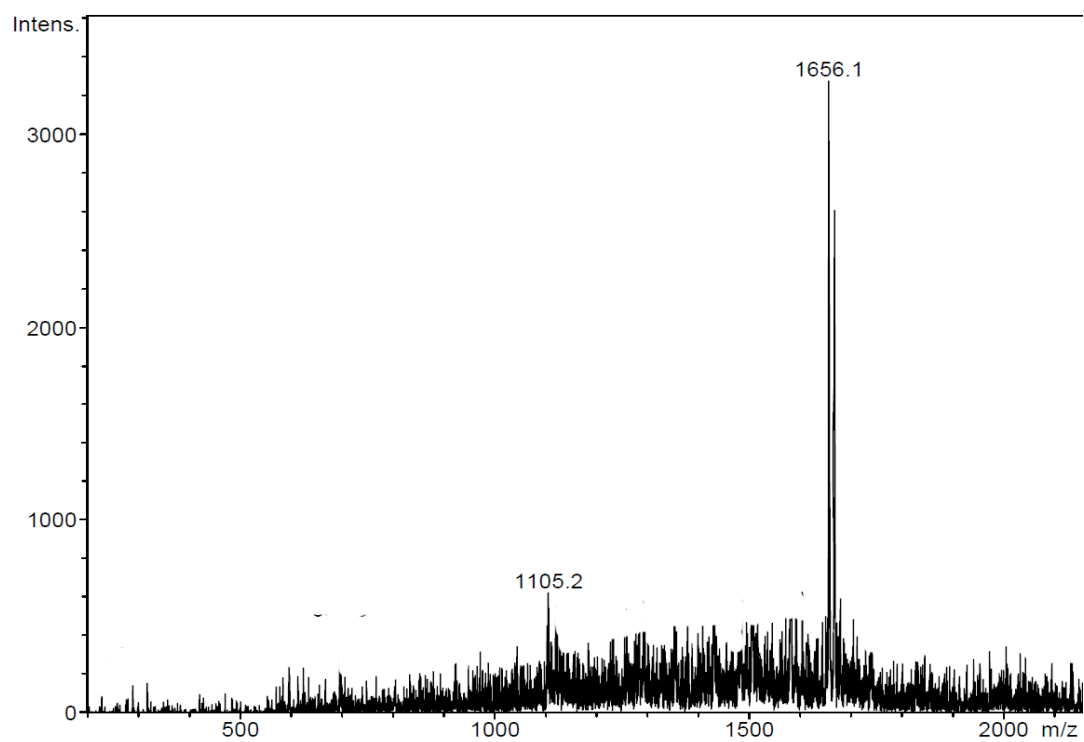

## B - Thermal denaturation followed by UV spectroscopy

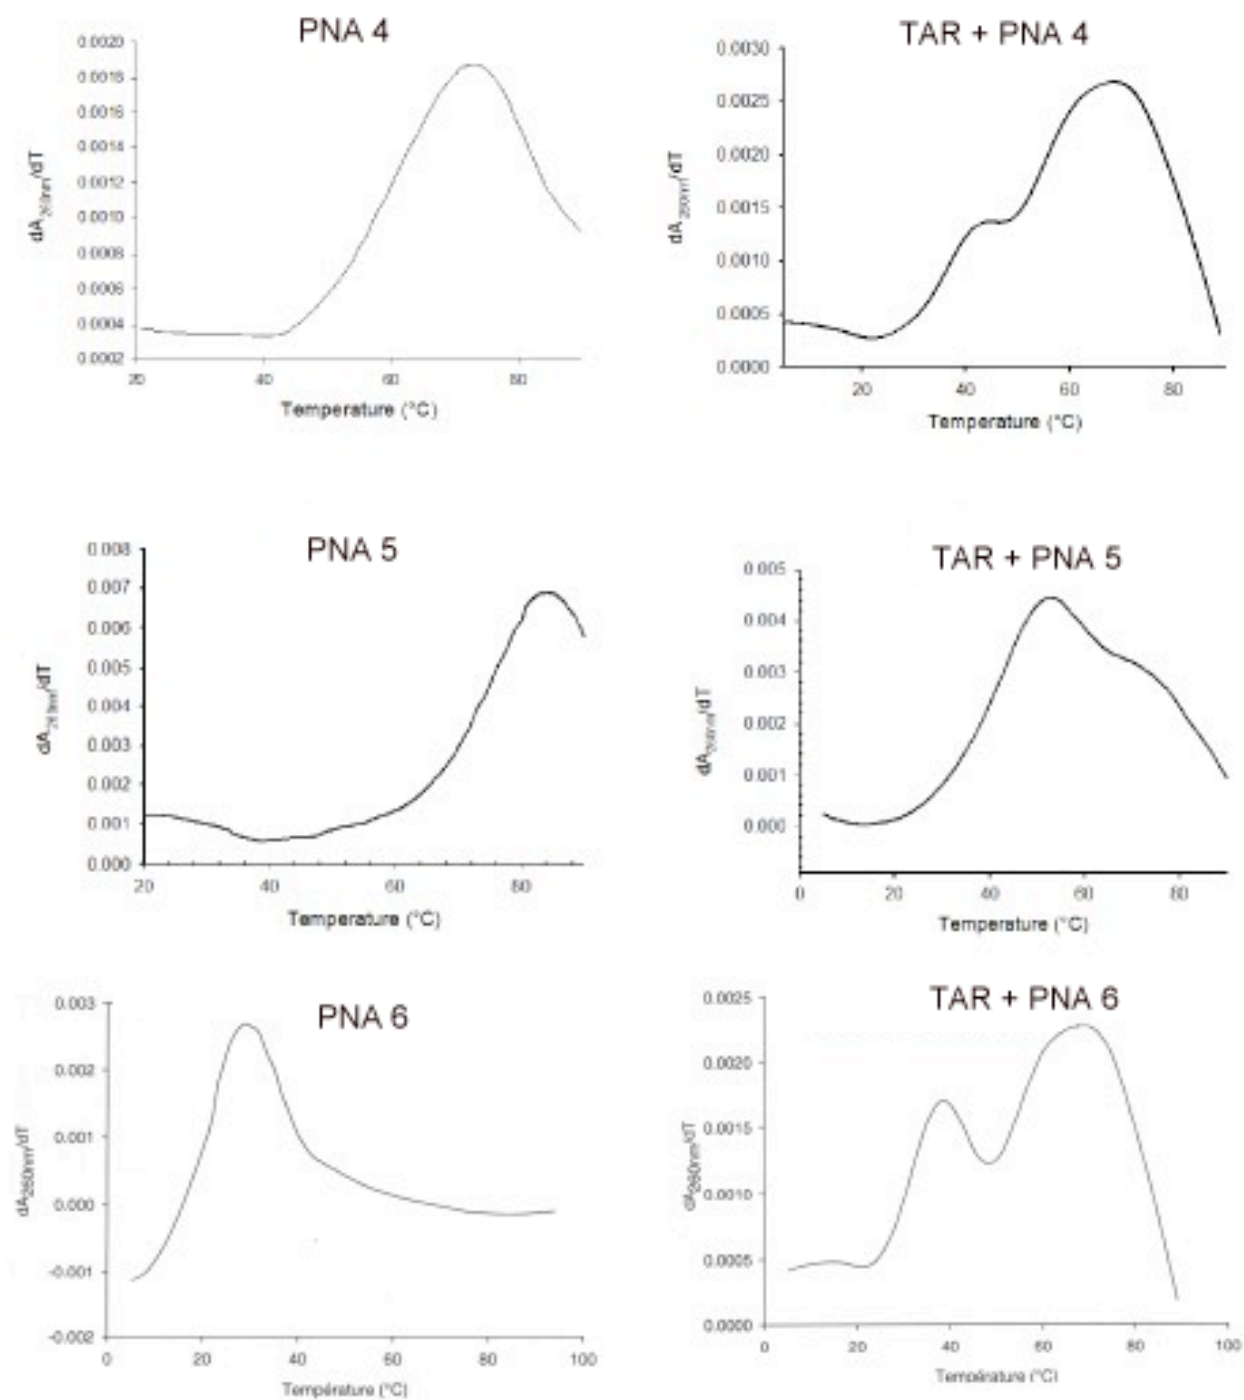

Supplement: f1 [file 591025.f1.pdf]
